# Supplementary material
Source: PubMed Central journal article supplement (PMC7577986)
Supplement: NIHMS1630073-supplement-008249_-_Supplemental_Material.pdf [file NIHMS1630073-supplement-008249_-_Supplemental_Material.pdf]

## SUPPLEMENTAL MATERIAL

### Supplemental Tables

**Supplementary Table I. Human Heart History**

| Heart No.               | Age | Sex | Prep     | Diagnoses                      |
|-------------------------|-----|-----|----------|--------------------------------|
| Heart #1                | 54  | F   | Biatrial | HTN, drug abuse                |
| Heart #2 <sup>1,2</sup> | 47  | M   | LRA      | ICM, CAD, LVAD, ICD            |
| Heart #3 <sup>1,2</sup> | 40  | M   | LRA      | NICM, PM/ICD, LVAD             |
| Heart #4 <sup>1,2</sup> | 60  | F   | LRA      | AF, NICM, PM/ICD               |
| Heart #5 <sup>1</sup>   | 62  | F   | LRA      | NICM, HTN, DM, PM/ICD          |
| Heart #6                | 53  | M   | LRA      | AF, NICM, HTN, LVAD,CRTD,      |
| Heart #7                | 31  | F   | Biatrial | SCD, VF                        |
| Heart #8                | 50  | F   | Biatrial | Hyperthyroidism                |
| Heart #9                | 24  | F   | Biatrial | Asthma, Cardiopulmonary arrest |
| Heart #10               | 60  | F   | Biatrial | HTN, drug abuse                |
| Heart #11               | 43  | M   | Biatrial | AF, SND, NICM, LVAD, ICD       |

AF-atrial fibrillation; CAD-coronary artery disease; CRTD-cardiac resynchronization therapy defibrillator; DM-diabetes; HTN-hypertension; (PM/)ICD-(pacemaker/)implantable cardioverter-defibrillator; LRA-lateral right atrium; LVAD-left ventricular assist device; (N/)ICM- (non/)ischemic cardiomyopathy; SCD-sudden cardiac death; SND-sinus node dysfunction; VF – ventricular fibrillation.

Previous publications in which some ex-vivo hearts were included shown below:

1. Hansen BJ, Zhao J, Li N, et al. Human Atrial Fibrillation Drivers Resolved With Integrated Functional and Structural Imaging to Benefit Clinical Mapping. *JACC Clin Electrophysiol.* 2018;4(12):1501-1515. doi:10.1016/j.jacep.2018.08.024
2. Li N, Csepe TA, Hansen BJ, et al. Adenosine-Induced Atrial Fibrillation. *Circulation.* 2016;134(6):486-498. doi:10.1161/CIRCULATIONAHA.115.021165

**Supplementary Table II. Statistical performance metrics**

| Algorithm |           | MEM Single-electrode |                       |                    |                       |                    |                          |
|-----------|-----------|----------------------|-----------------------|--------------------|-----------------------|--------------------|--------------------------|
|           |           | LD center            | LD center + periphery | HD center          | HD center + periphery | LD+HD center       | LD+HD center + periphery |
| kNN       | accuracy  | 0.84 ± 0.06          | 0.76 ± 0.03           | 0.84 ± 0.03        | 0.78 ± 0.09           | 0.87 ± 0.03        | 0.76 ± 0.03              |
|           | precision | 0.36 ± 0.21          | 0.35 ± 0.11           | 0.63 ± 0.12        | 0.63 ± 0.21           | 0.43 ± 0.19        | 0.44 ± 0.10              |
|           | recall    | 0.22 ± 0.11          | 0.24 ± 0.08           | 0.46 ± 0.13        | 0.65 ± 0.24           | 0.25 ± 0.10        | 0.35 ± 0.08              |
|           | f1-score  | 0.27 ± 0.15          | 0.28 ± 0.09           | <b>0.53 ± 0.12</b> | 0.63 ± 0.21           | 0.31 ± 0.12        | 0.39 ± 0.09              |
| XGBoost   | accuracy  | 0.83 ± 0.08          | 0.77 ± 0.04           | 0.74 ± 0.06        | 0.72 ± 0.06           | 0.88 ± 0.02        | 0.77 ± 0.05              |
|           | precision | 0.36 ± 0.22          | 0.33 ± 0.11           | 0.37 ± 0.1         | 0.54 ± 0.1            | 0.41 ± 0.13        | 0.48 ± 0.13              |
|           | recall    | 0.26 ± 0.16          | 0.19 ± 0.1            | 0.4 ± 0.17         | 0.75 ± 0.15           | 0.15 ± 0.07        | 0.28 ± 0.1               |
|           | f1-score  | <b>0.28 ± 0.15</b>   | 0.23 ± 0.1            | 0.37 ± 0.12        | 0.62 ± 0.1            | 0.21 ± 0.09        | 0.35 ± 0.11              |
| RF        | accuracy  | 0.74 ± 0.04          | 0.66 ± 0.03           | 0.70 ± 0.07        | 0.68 ± 0.08           | 0.70 ± 0.06        | 0.77 ± 0.04              |
|           | precision | 0.08 ± 0.06          | 0.24 ± 0.06           | 0.34 ± 0.09        | 0.5 ± 0.12            | 0.22 ± 0.07        | 0.52 ± 0.13              |
|           | recall    | 0.24 ± 0.16          | 0.35 ± 0.12           | 0.5 ± 0.09         | 0.77 ± 0.2            | 0.6 ± 0.16         | 0.23 ± 0.06              |
|           | f1-score  | 0.12 ± 0.07          | 0.28 ± 0.06           | 0.4 ± 0.09         | 0.6 ± 0.13            | 0.32 ± 0.10        | 0.31 ± 0.08              |
| SVM       | accuracy  | 0.89 ± 0.03          | 0.77 ± 0.06           | 0.80 ± 0.02        | 0.79 ± 0.08           | 0.87 ± 0.03        | 0.75 ± 0.04              |
|           | precision | 0.15 ± 0.19          | 0.41 ± 0.15           | 0.52 ± 0.16        | 0.66 ± 0.17           | 0.41 ± 0.22        | 0.45 ± 0.09              |
|           | recall    | 0.09 ± 0.1           | 0.4 ± 0.13            | 0.27 ± 0.13        | 0.66 ± 0.26           | 0.19 ± 0.11        | 0.49 ± 0.11              |
|           | f1-score  | 0.11 ± 0.12          | <b>0.4 ± 0.14</b>     | 0.33 ± 0.12        | 0.64 ± 0.19           | 0.26 ± 0.14        | <b>0.47 ± 0.09</b>       |
| LR        | accuracy  | 0.928 ± 0.001        | 0.720 ± 0.013         | 0.812 ± 0.019      | 0.770 ± 0.018         | 0.826 ± 0.012      | 0.698 ± 0.008            |
|           | precision | 0.30 ± 0.05          | 0.31 ± 0.02           | 0.52 ± 0.06        | 0.63 ± 0.03           | 0.30 ± 0.03        | 0.39 ± 0.01              |
|           | recall    | 0.07 ± 0.02          | 0.40 ± 0.04           | 0.46 ± 0.04        | 0.69 ± 0.04           | 0.46 ± 0.05        | 0.54 ± 0.03              |
|           | f1-score  | 0.11 ± 0.03          | 0.35 ± 0.03           | 0.49 ± 0.05        | <b>0.66 ± 0.03</b>    | <b>0.36 ± 0.04</b> | 0.45 ± 0.02              |

**Supplementary Table II continued**

| Algorithm |           | MEM Neighborhood   |                       |                    |                       |                    |                          |
|-----------|-----------|--------------------|-----------------------|--------------------|-----------------------|--------------------|--------------------------|
|           |           | LD center          | LD center + periphery | HD center          | HD center + periphery | LD+HD center       | LD+HD center + periphery |
| kNN       | accuracy  | 0.893 ± 0.011      | 0.875 ± 0.014         | 0.892 ± 0.005      | 0.875 ± 0.016         | 0.902 ± 0.008      | 0.819 ± 0.011            |
|           | precision | 0.26 ± 0.05        | 0.69 ± 0.04           | 0.73 ± 0.01        | 0.78 ± 0.03           | 0.55 ± 0.04        | 0.62 ± 0.03              |
|           | recall    | 0.34 ± 0.08        | 0.63 ± 0.05           | 0.70 ± 0.04        | 0.84 ± 0.04           | 0.52 ± 0.04        | 0.59 ± 0.03              |
|           | f1-score  | <b>0.30 ± 0.06</b> | <b>0.66 ± 0.04</b>    | <b>0.72 ± 0.02</b> | <b>0.81 ± 0.02</b>    | <b>0.54 ± 0.04</b> | 0.60 ± 0.02              |
| XGBoost   | accuracy  | 0.923 ± 0.008      | 0.866 ± 0.011         | 0.840 ± 0.018      | 0.811 ± 0.014         | 0.902 ± 0.005      | 0.821 ± 0.010            |
|           | precision | 0.4 ± 0.1          | 0.84 ± 0.05           | 0.56 ± 0.04        | 0.64 ± 0.02           | 0.60 ± 0.03        | 0.63 ± 0.02              |
|           | recall    | 0.20 ± 0.06        | 0.37 ± 0.04           | 0.81 ± 0.05        | 0.94 ± 0.02           | 0.31 ± 0.05        | 0.56 ± 0.05              |
|           | f1-score  | 0.26 ± 0.07        | 0.51 ± 0.05           | 0.66 ± 0.04        | 0.76 ± 0.02           | 0.41 ± 0.05        | 0.59 ± 0.03              |

|     |           |               |               |               |               |               |                    |
|-----|-----------|---------------|---------------|---------------|---------------|---------------|--------------------|
| RF  | accuracy  | 0.898 ± 0.004 | 0.807 ± 0.011 | 0.880 ± 0.015 | 0.837 ± 0.020 | 0.886 ± 0.008 | 0.801 ± 0.012      |
|     | precision | 0.22 ± 0.04   | 0.50 ± 0.02   | 0.71 ± 0.05   | 0.71 ± 0.03   | 0.47 ± 0.04   | 0.57 ± 0.03        |
|     | recall    | 0.21 ± 0.05   | 0.57 ± 0.02   | 0.64 ± 0.03   | 0.84 ± 0.03   | 0.43 ± 0.03   | 0.58 ± 0.02        |
|     | f1-score  | 0.21 ± 0.05   | 0.53 ± 0.01   | 0.67 ± 0.03   | 0.77 ± 0.03   | 0.45 ± 0.03   | 0.57 ± 0.02        |
|     |           |               |               |               |               |               |                    |
| SVM | accuracy  | 0.915 ± 0.007 | 0.875 ± 0.014 | 0.868 ± 0.016 | 0.866 ± 0.013 | 0.903 ± 0.004 | 0.834 ± 0.009      |
|     | precision | 0.24 ± 0.07   | 0.72 ± 0.04   | 0.74 ± 0.06   | 0.80 ± 0.02   | 0.61 ± 0.04   | 0.67 ± 0.02        |
|     | recall    | 0.13 ± 0.04   | 0.57 ± 0.07   | 0.49 ± 0.06   | 0.77 ± 0.03   | 0.32 ± 0.03   | 0.57 ± 0.03        |
|     | f1-score  | 0.17 ± 0.05   | 0.64 ± 0.05   | 0.59 ± 0.06   | 0.78 ± 0.02   | 0.42 ± 0.03   | <b>0.61 ± 0.02</b> |
|     |           |               |               |               |               |               |                    |
| LR  | accuracy  | 0.891 ± 0.008 | 0.758 ± 0.009 | 0.825 ± 0.013 | 0.788 ± 0.009 | 0.841 ± 0.014 | 0.721 ± 0.012      |
|     | precision | 0.14 ± 0.05   | 0.36 ± 0.02   | 0.54 ± 0.03   | 0.67 ± 0.02   | 0.34 ± 0.04   | 0.43 ± 0.02        |
|     | recall    | 0.12 ± 0.05   | 0.32 ± 0.03   | 0.64 ± 0.04   | 0.66 ± 0.02   | 0.48 ± 0.03   | 0.56 ± 0.04        |
|     | f1-score  | 0.13 ± 0.05   | 0.34 ± 0.03   | 0.59 ± 0.03   | 0.67 ± 0.02   | 0.40 ± 0.04   | 0.48 ± 0.03        |

Statistical performance metrics comparing the binary spectral classifiers including k-Nearest Neighbors (kNN), Scalable Gradient Boosting (XGBoost), Support Vector Machine (SVM), Random Forest (RF) and Logistic Regression (LR) for different datasets and feature sets. Datasets contain samples from low-density catheters (LD), samples from high-density catheters (HD), and a combination of both datasets (HD+LD). Feature sets contain features generated from the spectra of multi-electrode mapping (MEM) samples (MEM single-electrode), features from the spectra of electrode-neighborhood MEM samples (MEM electrode-neighborhood). All metrics are calculated on 10-folds of the testing set at their optimal ROC threshold computed on the training set.

**Supplementary Table III. Driver contrast for each AF recordings.**

| Type of catheter | Number of recording | Driver Contrast | Type of catheter | Number of recording | Driver Contrast |
|------------------|---------------------|-----------------|------------------|---------------------|-----------------|
| High Density     | HD_1                | 0.48            | Low Density      | LD_10               | 0.37            |
|                  | HD_2                | 0.44            |                  | LD_11               | 0.02            |
|                  | HD_3                | 0.28            |                  | LD_12               | -0.07           |
|                  | HD_4                | 0.19            |                  | LD_13               | 0.12            |
|                  | HD_5                | -0.01           |                  | LD_14               | 0.29            |
|                  | HD_6                | 0.32            |                  | LD_15               | 0.41            |
|                  | HD_7                | 0.27            |                  | LD_16               | -0.13           |
| Low Density      | LD_1                | 0.48            |                  | LD_17               | 0.22            |
|                  | LD_2                | 0.21            |                  | LD_18               | 0.22            |
|                  | LD_3                | 0.35            |                  | LD_19               | 0.44            |
|                  | LD_4                | 0.18            |                  | LD_20               | -0.04           |
|                  | LD_5                | -0.02           |                  | LD_21               | 0.39            |
|                  | LD_6                | 0.02            |                  | LD_22               | 0.62            |
|                  | LD_7                | 0.06            |                  | LD_23               | 0.73            |
|                  | LD_8                | 0.10            |                  | LD_24               | -0.20           |
|                  | LD_9                | 0.70            |                  | LD_25               | 0.20            |

Abbreviations as in **Supplementary Table II**.

**Supplementary Table IV. Feature Values for MEM and NIOM Feature Sets.**

|                                        | MEM single-electrode center |                 |           |               | MEM neighborhood center |                 |           |               |
|----------------------------------------|-----------------------------|-----------------|-----------|---------------|-------------------------|-----------------|-----------|---------------|
|                                        | Driver mean                 | Non-driver mean | Driver SD | Non-driver SD | Driver mean             | Non-driver mean | Driver SD | Non-driver SD |
| #peaks_0.05                            | 5.93                        | 10.44           | 5.21      | 6.99          | 6.52                    | 10.49           | 4.53      | 5.81          |
| #peaks_0.1                             | 3.24                        | 6.05            | 3.20      | 4.82          | 3.62                    | 6.08            | 2.75      | 3.86          |
| frequency 1                            | 11.24                       | 9.63            | 3.38      | 3.80          | 10.98                   | 9.59            | 2.90      | 2.86          |
| frequency 2                            | 11.15                       | 9.37            | 4.77      | 4.77          | 10.83                   | 9.35            | 3.19      | 3.22          |
| frequency 3                            | 9.78                        | 8.56            | 4.51      | 4.79          | 9.70                    | 8.53            | 3.10      | 3.31          |
| frequency 4                            | 9.26                        | 7.79            | 4.61      | 4.49          | 9.13                    | 7.81            | 3.09      | 2.93          |
| frequency 5                            | 9.02                        | 7.68            | 4.37      | 4.30          | 8.93                    | 7.68            | 2.85      | 2.75          |
| height 1                               | 0.0342                      | 0.0202          | 0.0265    | 0.0188        | 0.0327                  | 0.0204          | 0.0189    | 0.0151        |
| height 2                               | 0.0100                      | 0.0097          | 0.0079    | 0.0086        | 0.0103                  | 0.0097          | 0.0058    | 0.0066        |
| height 3                               | 0.0062                      | 0.0066          | 0.0036    | 0.0058        | 0.0066                  | 0.0067          | 0.0034    | 0.0043        |
| height 4                               | 0.0047                      | 0.0054          | 0.0028    | 0.0050        | 0.0050                  | 0.0054          | 0.0027    | 0.0037        |
| height 5                               | 0.0040                      | 0.0047          | 0.0023    | 0.0043        | 0.0042                  | 0.0047          | 0.0022    | 0.0033        |
| width 1                                | 1.66                        | 2.03            | 1.12      | 1.99          | 1.74                    | 2.05            | 1.00      | 1.41          |
| width 2                                | 1.91                        | 2.01            | 1.80      | 1.96          | 1.97                    | 2.01            | 1.35      | 1.21          |
| width 3                                | 1.67                        | 1.80            | 1.27      | 1.31          | 1.68                    | 1.79            | 0.59      | 0.63          |
| width 4                                | 1.61                        | 1.68            | 1.17      | 1.14          | 1.60                    | 1.68            | 0.51      | 0.53          |
| width 5                                | 1.59                        | 1.61            | 1.11      | 1.05          | 1.57                    | 1.61            | 0.46      | 0.48          |
| prominence 1                           | 0.0339                      | 0.0199          | 0.0265    | 0.0187        | 0.0324                  | 0.0200          | 0.0189    | 0.0151        |
| prominence 2                           | 0.0083                      | 0.0080          | 0.0078    | 0.0079        | 0.0085                  | 0.0080          | 0.0057    | 0.0061        |
| prominence 3                           | 0.0041                      | 0.0045          | 0.0034    | 0.0045        | 0.0044                  | 0.0045          | 0.0031    | 0.0031        |
| prominence 4                           | 0.0028                      | 0.0033          | 0.0024    | 0.0037        | 0.0030                  | 0.0033          | 0.0021    | 0.0025        |
| prominence 5                           | 0.0022                      | 0.0026          | 0.0018    | 0.0029        | 0.0023                  | 0.0026          | 0.0014    | 0.0020        |
| height ratio between peaks 1 and 2     | 4.33                        | 2.50            | 4.26      | 2.49          | 4.04                    | 2.52            | 3.02      | 1.97          |
| height ratio between peaks 1 and 3     | 6.81                        | 3.89            | 6.23      | 4.05          | 6.36                    | 3.90            | 4.82      | 3.11          |
| height ratio between peaks 1 and 4     | 8.56                        | 5.14            | 7.14      | 5.25          | 8.09                    | 5.14            | 5.63      | 4.16          |
| height ratio between peaks 2 and 3     | 1.76                        | 1.65            | 1.37      | 1.38          | 1.70                    | 1.64            | 0.81      | 1.00          |
| height ratio between peaks 2 and 4     | 2.40                        | 2.27            | 2.10      | 2.30          | 2.33                    | 2.26            | 1.32      | 1.83          |
| height ratio between peaks 3 and 4     | 1.43                        | 1.38            | 0.88      | 0.95          | 1.42                    | 1.38            | 0.64      | 0.82          |
| prominence ratio between peaks 1 and 2 | 333.00                      | 13.88           | 15396.89  | 528.26        | 226.44                  | 27.94           | 4335.01   | 1187.52       |

|                                        |        |       |         |        |        |       |        |        |
|----------------------------------------|--------|-------|---------|--------|--------|-------|--------|--------|
| prominence ratio between peaks 1 and 3 | 44.24  | 19.96 | 415.70  | 365.40 | 43.33  | 19.86 | 200.95 | 153.11 |
| prominence ratio between peaks 1 and 4 | 111.49 | 38.88 | 2074.35 | 655.12 | 101.14 | 45.56 | 806.49 | 505.88 |
| prominence ratio between peaks 2 and 3 | 7.05   | 6.59  | 49.20   | 141.48 | 7.78   | 6.03  | 32.84  | 50.69  |
| prominence ratio between peaks 2 and 4 | 31.08  | 17.72 | 739.78  | 414.54 | 28.24  | 21.31 | 296.73 | 318.20 |
| prominence ratio between peaks 3 and 4 | 10.57  | 8.57  | 239.17  | 190.74 | 9.68   | 9.73  | 83.49  | 114.69 |
| PSDR                                   | 5.52   | 5.35  | 0.66    | 0.75   | 5.49   | 5.34  | 0.55   | 0.59   |

**Supplementary Table IV continued.**

|                                    | MEM single-electrode center+periphery |                 |           |               | MEM neighborhood center+periphery |                 |           |               |
|------------------------------------|---------------------------------------|-----------------|-----------|---------------|-----------------------------------|-----------------|-----------|---------------|
|                                    | Driver mean                           | Non-driver mean | Driver SD | Non-driver SD | Driver mean                       | Non-driver mean | Driver SD | Non-driver SD |
| #peaks_0.05                        | 6.52                                  | 10.49           | 4.53      | 5.81          | 7.63                              | 10.80           | 4.97      | 5.86          |
| #peaks_0.1                         | 3.62                                  | 6.08            | 2.75      | 3.86          | 4.25                              | 6.29            | 3.13      | 3.90          |
| frequency 1                        | 10.98                                 | 9.59            | 2.90      | 2.86          | 10.58                             | 9.49            | 2.93      | 2.84          |
| frequency 2                        | 10.83                                 | 9.35            | 3.19      | 3.22          | 10.50                             | 9.21            | 3.32      | 3.17          |
| frequency 3                        | 9.70                                  | 8.53            | 3.10      | 3.31          | 9.25                              | 8.48            | 3.20      | 3.31          |
| frequency 4                        | 9.13                                  | 7.81            | 3.09      | 2.93          | 8.69                              | 7.74            | 3.10      | 2.90          |
| frequency 5                        | 8.93                                  | 7.68            | 2.85      | 2.75          | 8.50                              | 7.61            | 2.87      | 2.73          |
| height 1                           | 0.0327                                | 0.0204          | 0.0189    | 0.0151        | 0.0296                            | 0.0193          | 0.0185    | 0.0144        |
| height 2                           | 0.0103                                | 0.0097          | 0.0058    | 0.0066        | 0.0106                            | 0.0096          | 0.0064    | 0.0065        |
| height 3                           | 0.0066                                | 0.0067          | 0.0034    | 0.0043        | 0.0068                            | 0.0066          | 0.0037    | 0.0043        |
| height 4                           | 0.0050                                | 0.0054          | 0.0027    | 0.0037        | 0.0053                            | 0.0054          | 0.0030    | 0.0038        |
| height 5                           | 0.0042                                | 0.0047          | 0.0022    | 0.0033        | 0.0044                            | 0.0047          | 0.0025    | 0.0033        |
| width 1                            | 1.74                                  | 2.05            | 1.00      | 1.41          | 1.84                              | 2.07            | 1.09      | 1.45          |
| width 2                            | 1.97                                  | 2.01            | 1.35      | 1.21          | 2.00                              | 2.01            | 1.34      | 1.20          |
| width 3                            | 1.68                                  | 1.79            | 0.59      | 0.63          | 1.72                              | 1.79            | 0.60      | 0.63          |
| width 4                            | 1.60                                  | 1.68            | 0.51      | 0.53          | 1.62                              | 1.68            | 0.50      | 0.53          |
| width 5                            | 1.57                                  | 1.61            | 0.46      | 0.48          | 1.59                              | 1.61            | 0.46      | 0.48          |
| prominence 1                       | 0.0324                                | 0.0200          | 0.0189    | 0.0151        | 0.0293                            | 0.0190          | 0.0184    | 0.0143        |
| prominence 2                       | 0.0085                                | 0.0080          | 0.0057    | 0.0061        | 0.0088                            | 0.0078          | 0.0062    | 0.0060        |
| prominence 3                       | 0.0044                                | 0.0045          | 0.0031    | 0.0031        | 0.0046                            | 0.0045          | 0.0031    | 0.0032        |
| prominence 4                       | 0.0030                                | 0.0033          | 0.0021    | 0.0025        | 0.0032                            | 0.0033          | 0.0022    | 0.0025        |
| prominence 5                       | 0.0023                                | 0.0026          | 0.0014    | 0.0020        | 0.0025                            | 0.0026          | 0.0016    | 0.0021        |
| height ratio between peaks 1 and 2 | 4.04                                  | 2.52            | 3.02      | 1.97          | 3.52                              | 2.43            | 2.70      | 1.90          |

|                                        |        |       |             |             |        |       |             |        |
|----------------------------------------|--------|-------|-------------|-------------|--------|-------|-------------|--------|
| height ratio between peaks 1 and 3     | 6.36   | 3.90  | 4.82        | 3.11        | 5.54   | 3.75  | 4.35        | 2.97   |
| height ratio between peaks 1 and 4     | 8.09   | 5.14  | 5.63        | 4.16        | 7.07   | 4.97  | 5.23        | 4.05   |
| height ratio between peaks 2 and 3     | 1.70   | 1.64  | 0.81        | 1.00        | 1.71   | 1.63  | 1.02        | 0.97   |
| height ratio between peaks 2 and 4     | 2.33   | 2.26  | 1.32        | 1.83        | 2.34   | 2.25  | 1.66        | 1.82   |
| height ratio between peaks 3 and 4     | 1.42   | 1.38  | 0.64        | 0.82        | 1.40   | 1.38  | 0.69        | 0.83   |
| prominence ratio between peaks 1 and 2 | 226.44 | 27.94 | 4335.0<br>1 | 1187.5<br>2 | 160.56 | 15.81 | 3731.3<br>1 | 272.85 |
| prominence ratio between peaks 1 and 3 | 43.33  | 19.86 | 200.95      | 153.11      | 32.38  | 19.38 | 159.57      | 158.94 |
| prominence ratio between peaks 1 and 4 | 101.14 | 45.56 | 806.49      | 505.88      | 72.94  | 45.13 | 605.12      | 527.81 |
| prominence ratio between peaks 2 and 3 | 7.78   | 6.03  | 32.84       | 50.69       | 6.68   | 6.08  | 28.74       | 53.74  |
| prominence ratio between peaks 2 and 4 | 28.24  | 21.31 | 296.73      | 318.20      | 21.40  | 22.27 | 218.17      | 340.12 |
| prominence ratio between peaks 3 and 4 | 9.68   | 9.73  | 83.49       | 114.69      | 7.97   | 10.26 | 65.73       | 122.31 |
| PSDR                                   | 5.49   | 5.34  | 0.55        | 0.59        | 5.45   | 5.33  | 0.58        | 0.59   |

PSDR = peak to standard deviation ratio, SD = standard deviation.

## Supplemental Figure and Figure Legend

### Supplementary Figure I. Example of Single-Electrode and Neighborhood Spectra

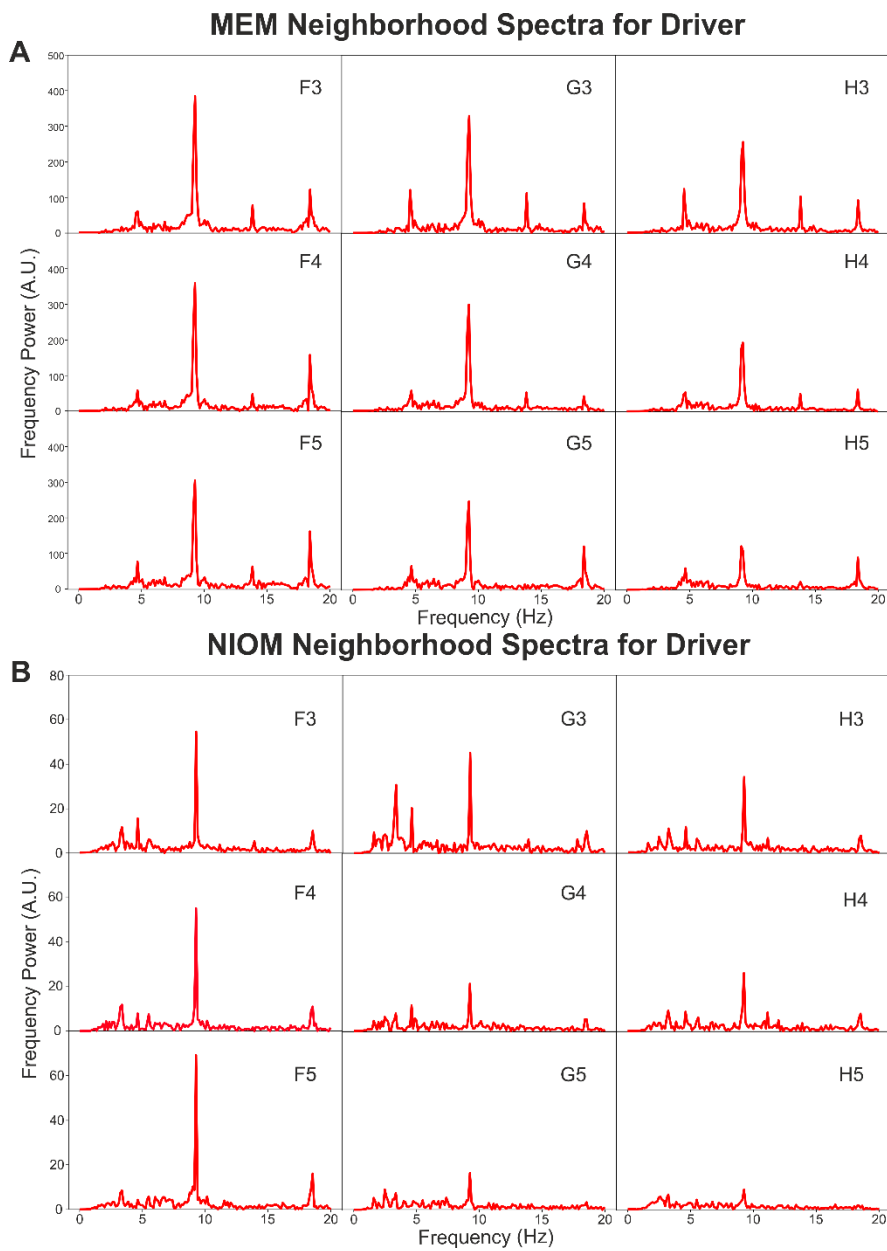



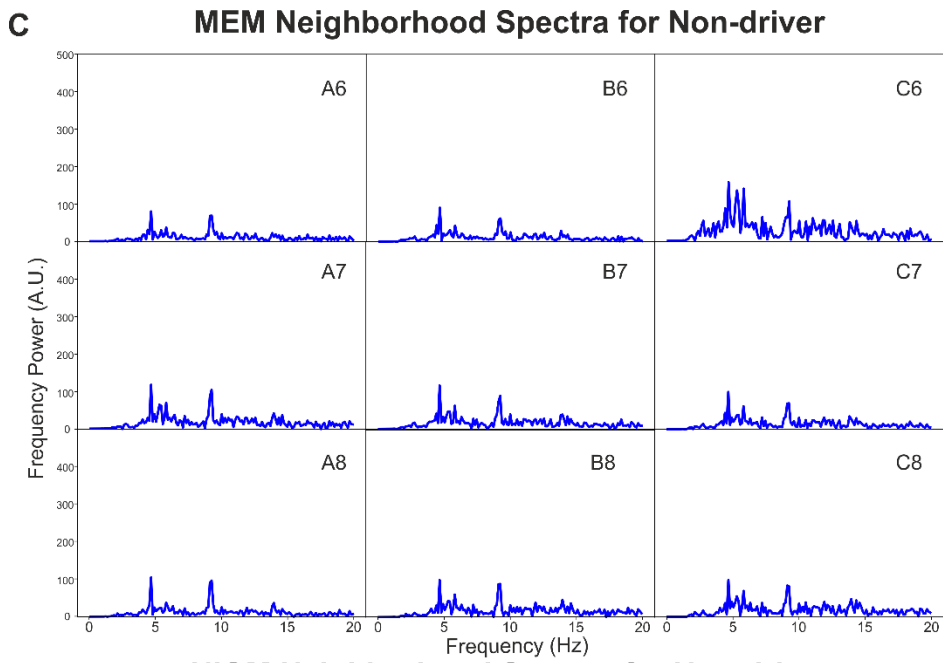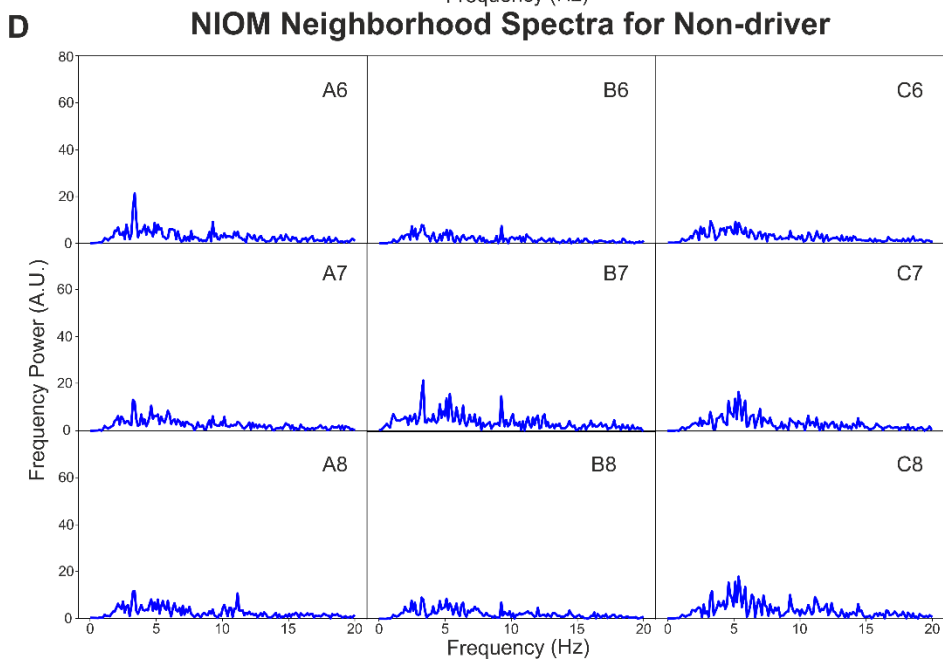

Red color denotes Fourier spectra from driver electrodes, blue color denotes Fourier spectra from non-driver electrodes. A.U. = arbitrary units, MEM = multi-electrode mapping, NIOM = near-infrared optical mapping

**Supplementary Figure II. Comparison between Performance on Single-Electrode Vs Neighborhood Feature Sets.**

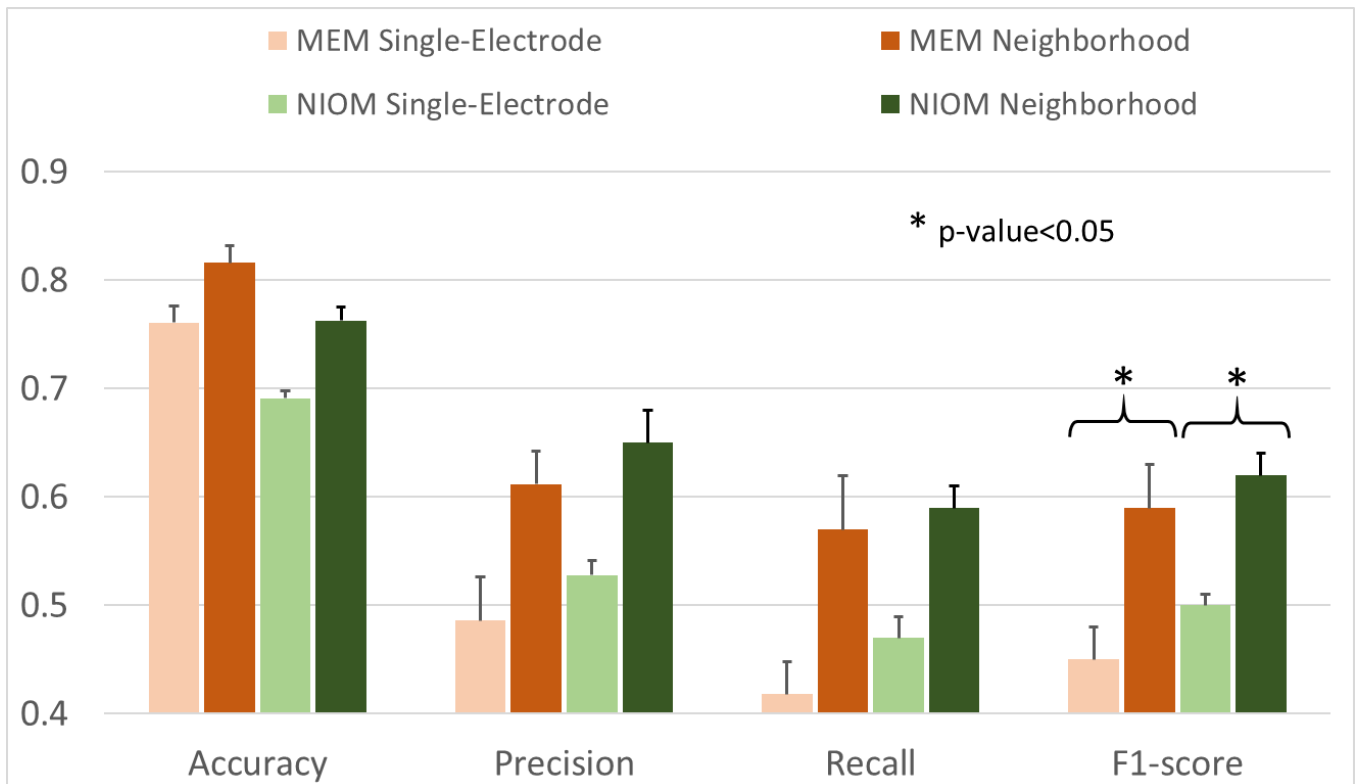

Abbreviations as in **Supplementary Figure I.**

**Supplementary Figure III. The Most Valuable Features for HD and LD datasets.**

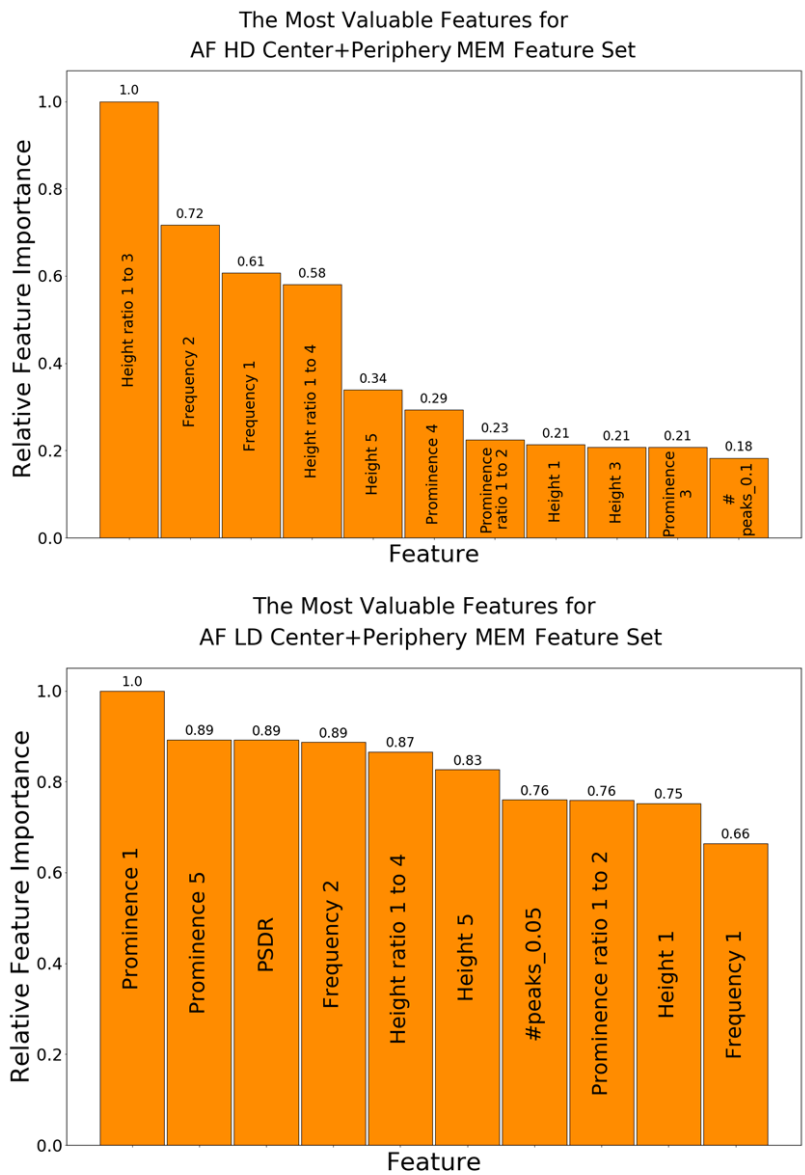

Names and relative feature importance of top valuable features for neighbor-electrodes MEM feature set for the samples from high-density catheter (AF HD, top Panel) and from low-density catheter (AF LD, bottom Panel). Abbreviations as in **Supplementary Figure I**. PSDR – Peak to Standard Deviation Ratio.

## Supplementary Figure IV. The Comparison between the Most Valuable Features for Center vs Center plus Periphery Annotation.

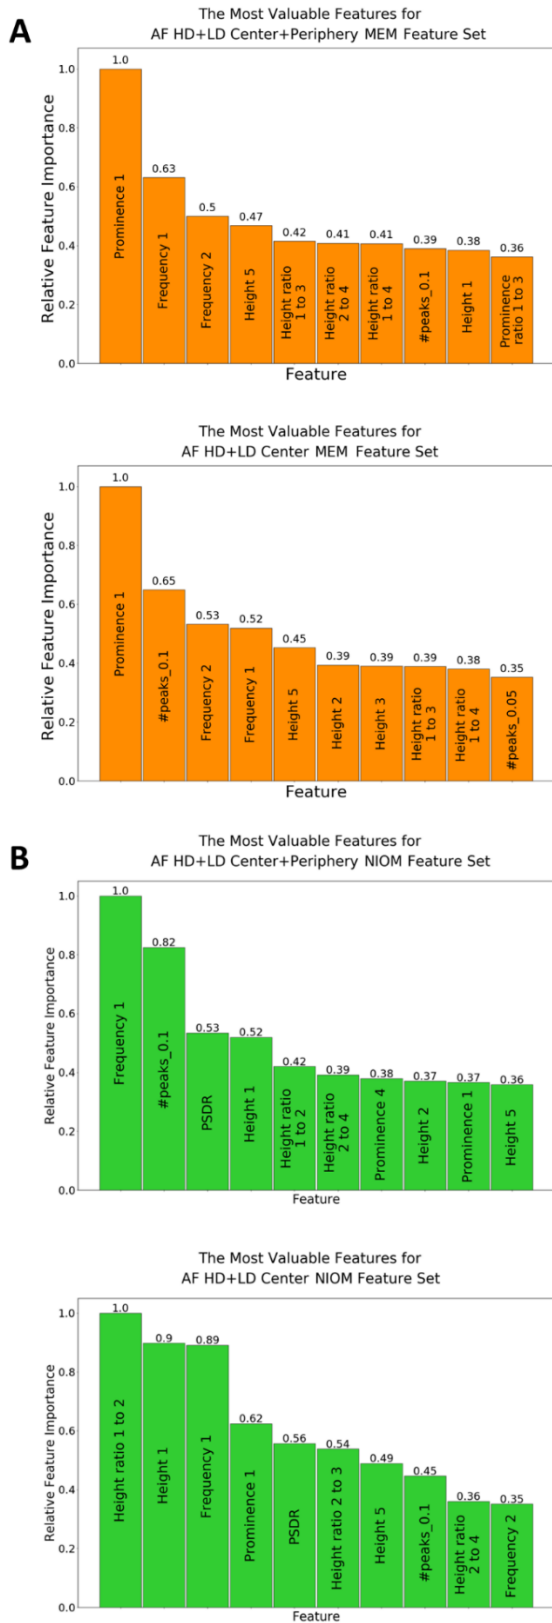

Abbreviations as in **Supplementary Figure IV**.

**Supplementary Figure V. The Comparison between the Most Valuable Features for Center vs Center plus Periphery Annotation of LD+HD Single-Electrode Dataset.**

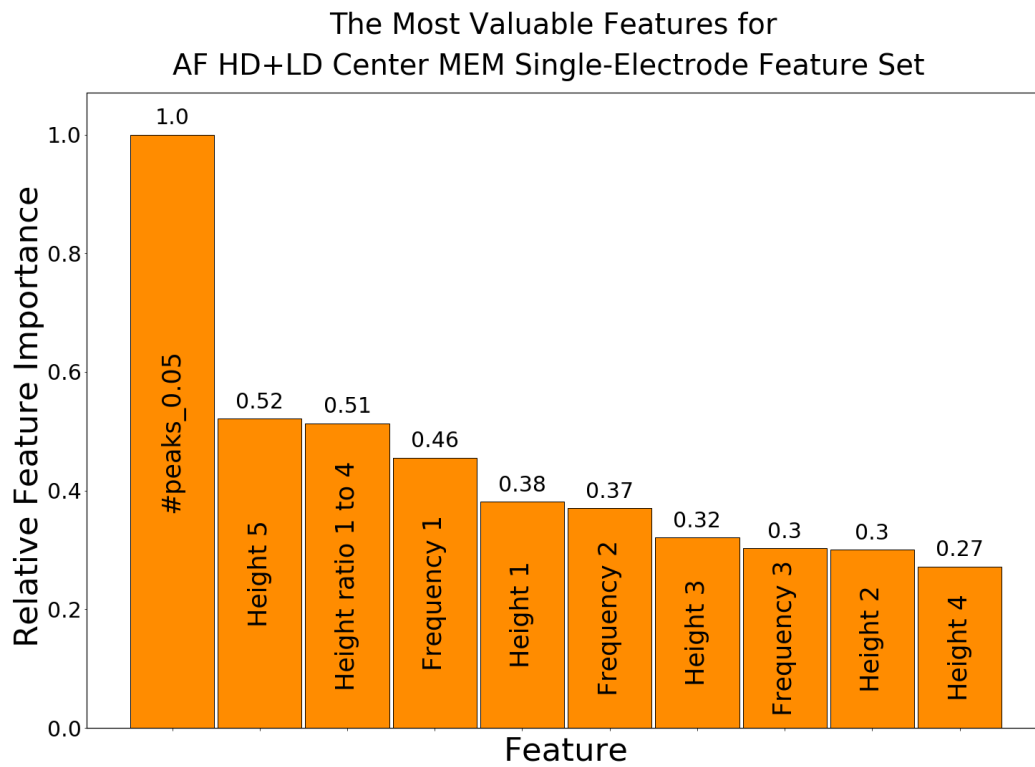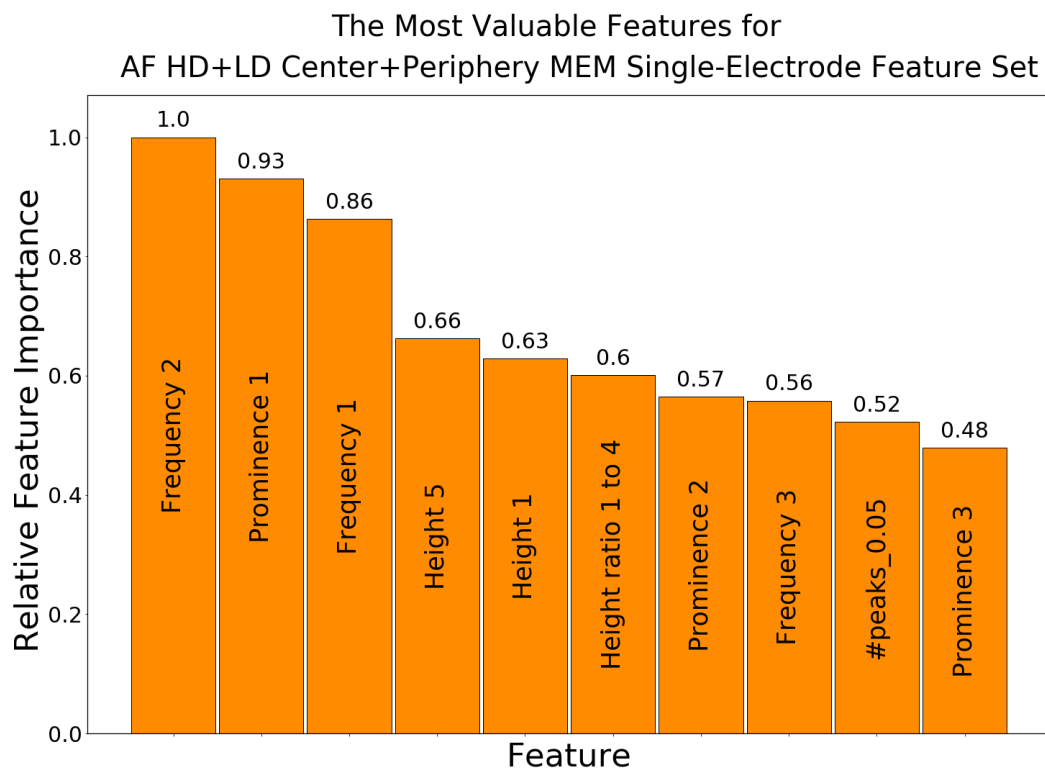

Abbreviations as in **Supplementary Figure IV.**

# Supplementary Figure VI. Distributions of 10 the Most Important Features for Hold-Out

## Recording from Heart #8.

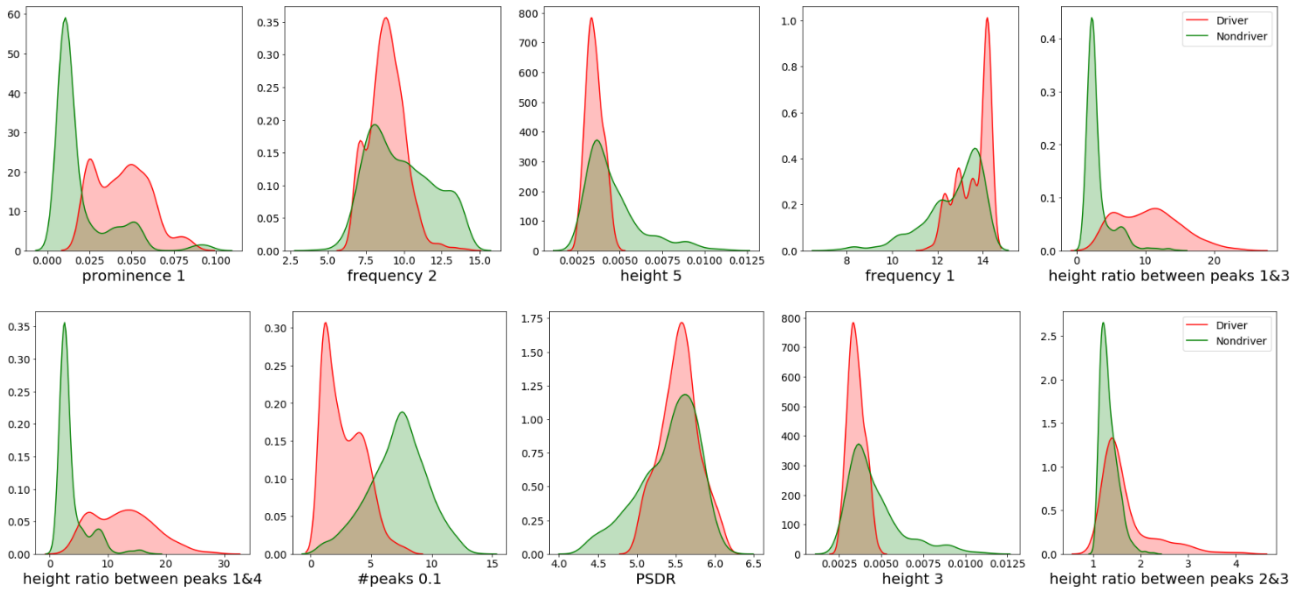

PSDR – Peak to Standard Deviation Ratio.

**Supplementary Figure VII. The Comparison between ML Probability Prediction Heat Maps by All vs 10 the Most Valuable Driver Features**

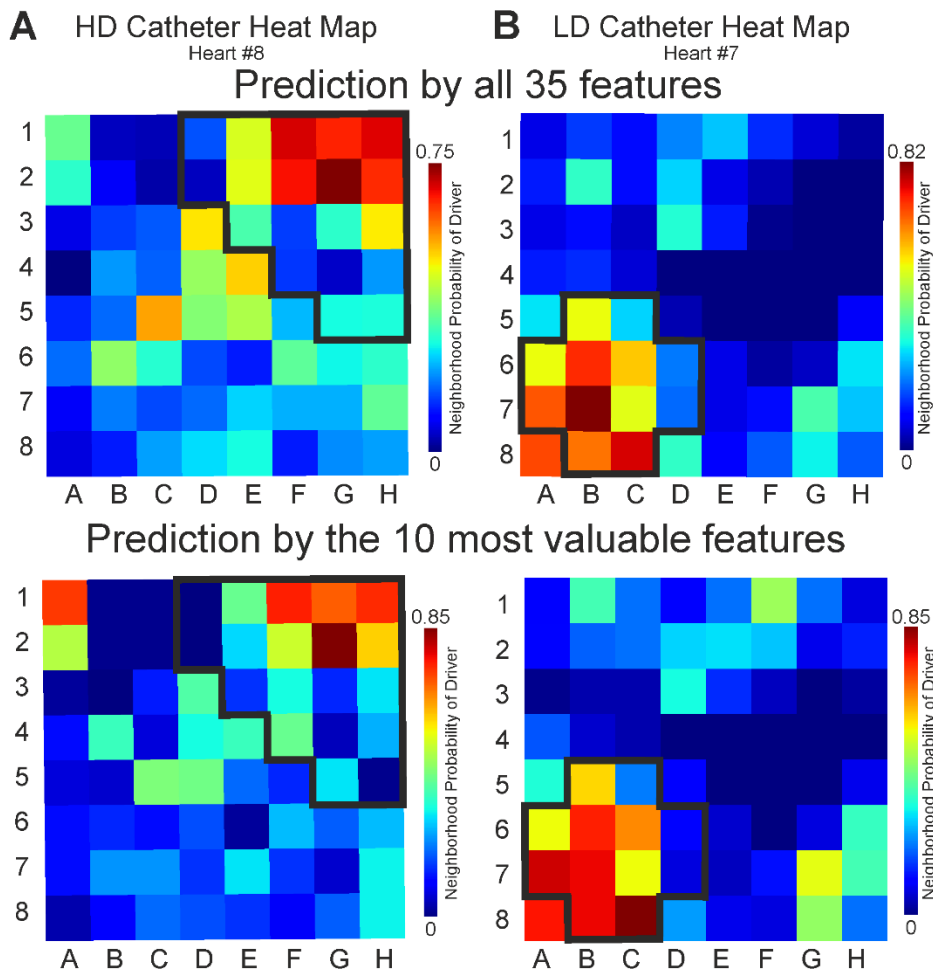

(A) Higher-density (HD) catheter and (B) Lower-density (LD) catheter. Ground truth driver region (center plus periphery) is outlined by black bold line. The color bar encodes probability of an electrode to be a driver.
